# Supplementary material
Source: PubMed Central journal article supplement (PMC3512063)
Supplement: supp_en.2012-1324v1_EN-12-1324Tabs2.pdf [file supp_en.2012-1324v1_EN-12-1324Tabs2.pdf]

Supplemental Table 1. Primers for genotyping analysis

|                | Forward primer       | Reverse primer       | PS  | AT | Cycles |
|----------------|----------------------|----------------------|-----|----|--------|
| <i>Maml1</i>   | TTTGCAACTCCAGCATCATC | CCTAACTCCTTCCCCTGGAC | 518 | 67 | 35     |
| <i>PGK-neo</i> | TGCTCCTGCCGAGAAAGTAT | AATATCACGGGTAGCCAACG | 364 | 67 | 35     |
| <i>Sry</i>     | ATGGAGGGCCATGTCAAG   | GCCCAGTGGGGATATCAA   | 424 | 67 | 35     |

PS: product size (bp); and AT: annealing temperature (°C).

Supplemental Table 2. TaqMan probe-primer mixes utilized in this study

|                | Assay ID                 | Expression-positive cells in the fetal testis   |
|----------------|--------------------------|-------------------------------------------------|
| <i>Mamld1</i>  | Mm01293665_m1            | Sertoli cells and Leydig cells                  |
| <i>Amh</i>     | Mm03023963_m1            | Sertoli cells                                   |
| <i>Ar</i>      | Mm00442688_m1            | Germ cells, Leydig cells, and peritubular cells |
| <i>Arx</i>     | Mm00545903_m1            | Interstitial cells excluding Leydig cells       |
| <i>Cyp11a1</i> | Mm00490735_m1            | Leydig cells                                    |
| <i>Cyp17a1</i> | Mm00484040_m1            | Leydig cells                                    |
| <i>Ddx4</i>    | Mm00802445_m1            | Germ cells                                      |
| <i>Dhh</i>     | Mm01310203_m1            | Sertoli cells                                   |
| <i>Dlx5</i>    | Mm01161781_m1            | Leydig cells                                    |
| <i>Dlx6</i>    | Mm01166201_m1            | Leydig cells                                    |
| <i>Gata4</i>   | Mm00484689_m1            | Sertoli cells and Leydig cells                  |
| <i>Hsd17b3</i> | Mm00515131_m1            | Sertoli cells (seminiferous tubules)            |
| <i>Hsd3b1</i>  | Mm01261921_mH            | Leydig cells                                    |
| <i>Insl3</i>   | Mm01340353_m1            | Leydig cells                                    |
| <i>Nr5a1</i>   | Mm00446826_m1            | Sertoli cells and Leydig cells                  |
| <i>Ptch1</i>   | Mm01306905_m1            | Interstitial cells including Leydig cells       |
| <i>Sox9</i>    | Mm00448840_m1            | Sertoli cells                                   |
| <i>Star</i>    | Mm00441558_m1            | Leydig cells                                    |
| <i>Gapdh</i>   | 4352339E (Mm99999915_g1) | Ubiquitous                                      |
